# Supplementary material for: Solvent and surface controlled self-assembly of diphenylalanine peptide: from microtubes to nanofibers
Source: Royal Society of Chemistry journal article supplement (doi:10.1039/c1sm05752a), 2011-01-01
Supplement: c1sm05752a.pdf [file c1sm05752a.pdf]

## Supporting Information

### 1. Experimental Section

*Preparation of Peptide Microtubes and Nanofibers:* The lyophilized diphenylalanine peptide (Bachem, Switzerland) was dissolved in acetonitrile-water solvent (2 mg/mL) at 95 °C for 4 min, which yields a transparent solution. The acetonitrile content in solvent mixture was varied from 0% to 100%. The resulting peptide solutions were 1) in-situ cooled to room temperature; 2) deposited on microscopic glass coverslips and dried at ambient temperature. When the acetonitrile content increased to 90%, the self-assembly rate was dramatically improved and a vast number of peptide assemblies were formed within several minutes. All the self-assembly processes on glass surface were very quick and required only several seconds, due to the simultaneous cooling and evaporation of solvent.

*Scanning Electron Microscopy:* All the samples were sputter-coated with platinum using E1045 Pt-coater (Hitachi, Japan), and then imaged by an S-4800 field emission scanning electron microscope (Hitachi High-technologies CO., Japan) at the acceleration voltage of 5 kV.

*X-Ray Diffraction:* X-ray diffraction measurements were performed on a D8 Focus powder diffractometer (Bruker, German). The diffracted intensity of CuK $\alpha$  radiation (wavelength of 1.5418 nm, under a condition of 40 kV and 40 mA) was measured with a scan rate of 2 °/min in a 2 $\theta$  range between 3 ° to 50 °.

### 2. Supporting Figures

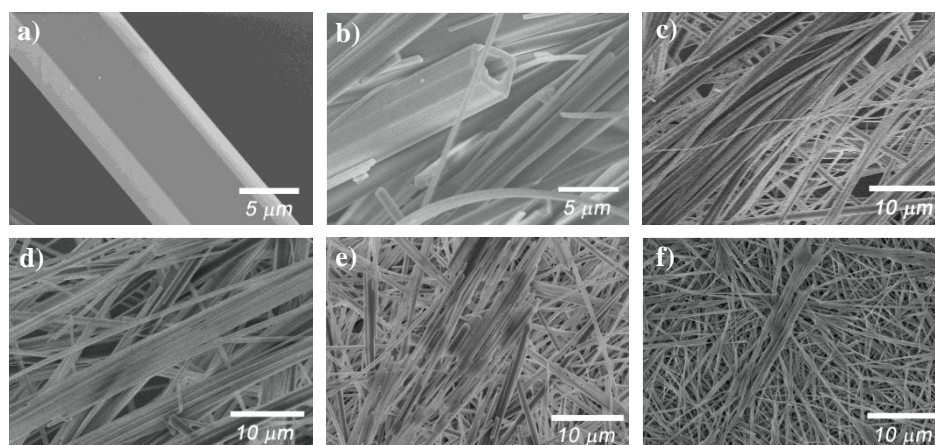

**Fig. S1** SEM images of diphenylalanine assemblies (Route I) with different acetonitrile content (a-5%; b-10%; c-30%; d-70%; e-90%; f-95%).

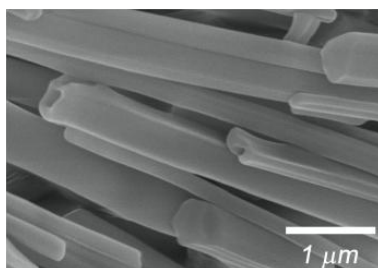

**Fig. S2** SEM images of hollow diphenylalanine nanotubes (Route I) with 90% acetonitrile content.

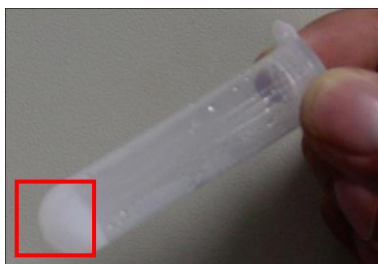

**Fig. S3** Macroscopic image of diphenylalanine assemblies formed in acetonitrile-water solvent mixture with 90% acetonitrile content (Route I).

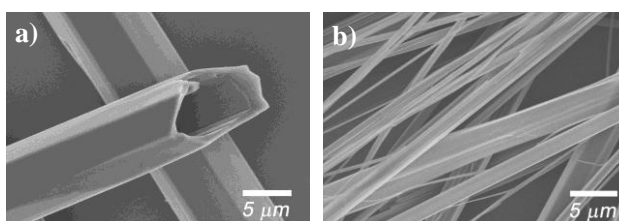

**Fig. S4** SEM images of diphenylalanine assemblies (Route II) on glass surface with different acetonitrile content (a- 50%; b-70%).

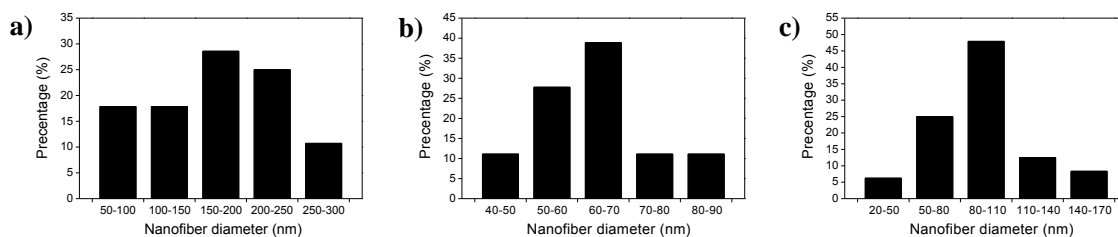

**Fig. S5** Diameter distribution of nanofibers assembled on glass surfaces with various acetonitrile contents (a-90%; b-95%; c-100%).

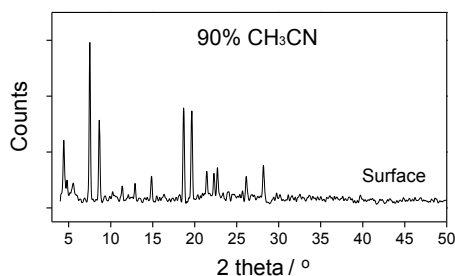

**Fig. S6** Powder XRD patterns of diphenylalanine nanofibers prepared on a glass surface with 90% acetonitrile.

### 3. Supporting Tables

**Table S1** The property parameters of organic solvents

| Solvent      | Polarity index | HBD ability | HBA ability | Surface tension | Assemblies morphology               |
|--------------|----------------|-------------|-------------|-----------------|-------------------------------------|
| Water        | 10.20          | 1.17        | <b>0.47</b> | <b>72.80</b>    | Nanotubes/Microtubes <sup>a,b</sup> |
| Acetonitrile | 5.80           | 0.19        | <b>0.40</b> | 19.10           | Nanofibers <sup>b</sup>             |
| Methanol     | 5.10           | 0.98        | <b>0.66</b> | 22.55           | Nanofibers <sup>b</sup>             |
| Ethanol      | 4.3            | 0.86        | <b>0.75</b> | 22.27           | Microcrystals <sup>c</sup>          |
| Chloroform   | 4.10           | 0.20        | 0.10        | 27.16           | Organogels <sup>d</sup>             |
| Toluene      | 2.40           | 0.00        | 0.11        | 28.53           | Organogels <sup>d</sup>             |

Note: a-ref.<sup>1,2</sup> and this work; b-this work; c-Ref.<sup>3</sup>; d-Ref.<sup>4</sup>.

#### Reference

- [1] Kim, J.; Han, T. H.; Kim, Y. I.; Park, J. S.; Choi, J.; Churchill, D. G.; Kim, S. O.; Ihee, H. *Adv. Mater.* **2010**, 22, 583-587.
- [2] Reches, M.; Gazit, E. *Science* **2003**, 300, 625-627.
- [3] Zhu, P. L.; Yan, X. H.; Su, Y.; Yang, Y.; Li, J. B. *Chem.-Eur. J.* **2010**, 16, 3176-3183.
- [4] Yan, X. H.; Cui, Y.; He, Q.; Wang, K. W.; Li, J. B. *Chem. Mat.* **2008**, 20, 1522-1526.
